# Supplementary material
Source: publisher figshare collection journal article supplement (https://sage.figshare.com/ndownloader/files/15111665)
Supplement: Supplementary file 1 [file 15111665]

## **Appendix B:**

### **Video-based Discussion Protocol**

#### **1. Introduction and coordination of expectations (5 mins.)**

The facilitator presents the goals of the meeting; the reasons for selection of the particular video and/or issues for discussion; and the anticipated progression of the discussion, including ethical guidelines.

#### **2. Presentation of the case and definition of the issue (10-15 mins.)**

a. **Context:** The facilitator presents the background to the event depicted in the video: grade level, subject matter, temporal point in the year, point in the lesson, what transpired beforehand, and so forth.

b. **Screening of the video** and distribution of transcript.

c. **Clarification of the case:** Participants ask clarification questions regarding specific information necessary to understand the event.

d. **Definition of the issue:** The facilitator presents a question or issue to be discussed in light of the event.

#### **3. Description (5 mins.)**

Participants describe what they saw and heard in the event.

#### **4. Analysis of the issue (10-15 mins.)**

Participants raise explanations as to the factors involved in the defined issue and hypotheses regarding possible implications. The facilitator summarizes the analysis of the issue and may, in light of this analysis, reframe the issue.

#### **5. Suggestions for dealing with the issue (20 mins.)**

Participants raise possible ways to deal with the issue, weighing their relative advantages and disadvantages.

## **6. Reflection and summary**

- Participants consider the process they underwent: How was it? What did we learn? How will we improve the process next time?
- What questions or ideas did the discussion raise regarding our teaching? What would we like to try in our classrooms and/or continue discussing in the group?
